# Supplementary material for: Taste 2 Receptor Is Involved in Differentiation of 3T3-L1 Preadipocytes
Source: MDPI journal article supplement (doi:10.3390/ijms23158120), 2022-07-23
Supplement: s1 [file s1]

## Taste 2 receptor is involved in differentiation of 3T3-L1 preadipocytes

Shunsuke Kimura <sup>1,2</sup>, Ai Tsuruma <sup>1</sup> and Eisuke Kato <sup>3,\*</sup>

<sup>1</sup> Graduate School of Agriculture, Hokkaido University, Kita-ku, Sapporo 060-8589, Hokkaido, Japan

<sup>2</sup> Japan Society for the Promotion of Science (JSPS), Chiyoda-ku, Tokyo 102-0083, Japan

<sup>3</sup> Division of Fundamental AgriScience and Research, Research Faculty of Agriculture, Hokkaido University, Kita-ku, Sapporo 060-8589, Hokkaido, Japan

\* Correspondence: eikato@eis.hokudai.ac.jp

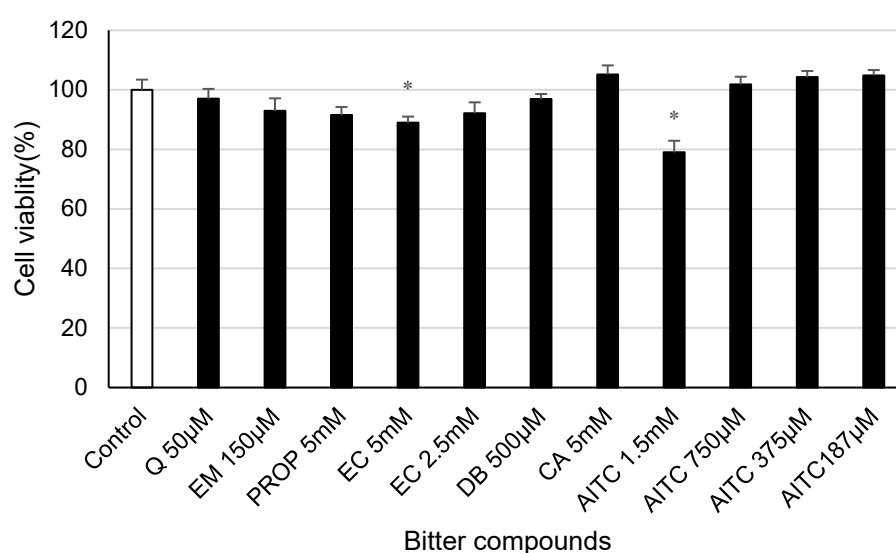

**Figure S1. Cell viability after stimulation by bitter compounds.** 3T3-L1 adipocytes are stimulated by bitter compound at the indicated concentration for 1 hr and cell viability was measured with Cell Counting Kit-8 (Dojindo Laboratories). Quinine (Q), emetine (EM), 6-propyl-2-thiouracil (PROP), epicatechin (EC), denatonium benzoate (DB), camphor (CA, 5 mM), allyl isothiocyanate (AITC).

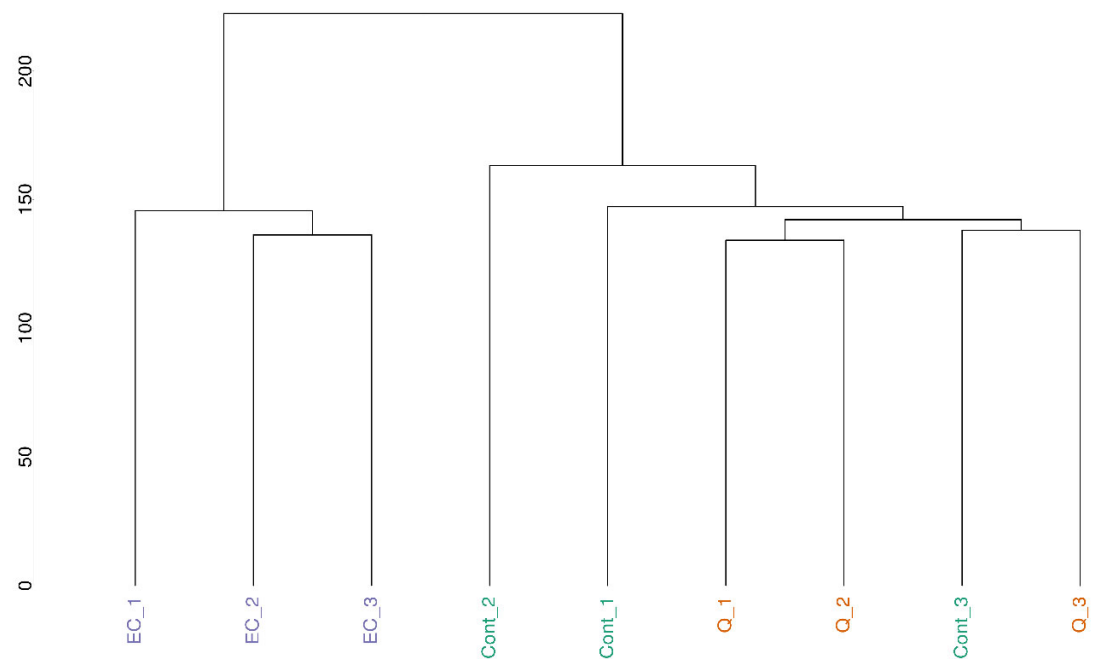

**Figure S2. Clustering analysis of RNA-seq result.** Cont\_1-3: control cells. EC\_1-3: epicatechin stimulated 3T3-L1 adipocytes. Q\_1-3: quinine stimulated 3T3-L1 adipocytes.

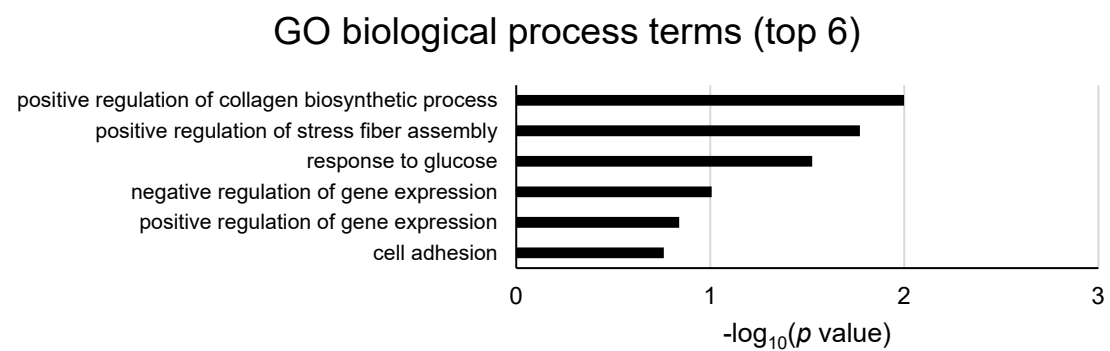

**Figure S3. GO terms of downregulated genes of 3T3-L1 adipocytes stimulated by epicatechin.**
